# Supplementary material for: Evaluation of Bufadienolides as the Main Antitumor Components in Cinobufacin Injection for Liver and Gastric Cancer Therapy
Source: PubMed Central journal article supplement (PMC5231367; doi:10.1371/journal.pone.0169141), 2017-01-12

# Graphical abstract

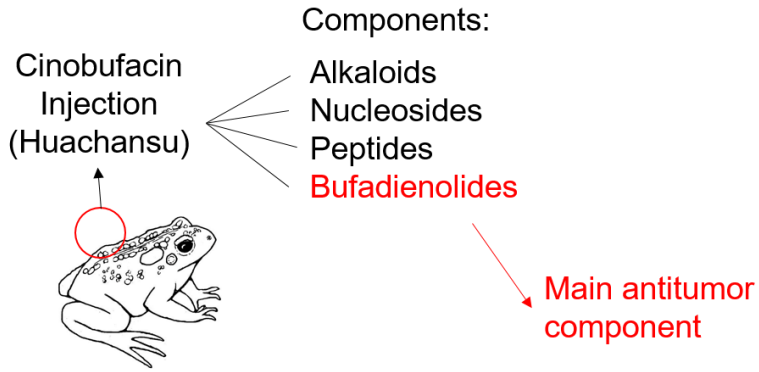

### MKN-45 gastric cancer

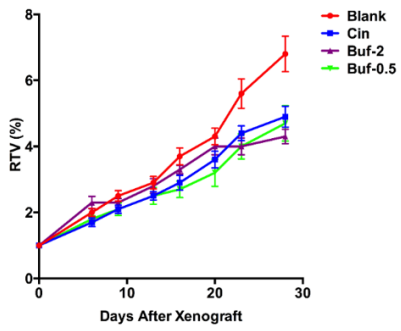

### HepG-2 liver cancer

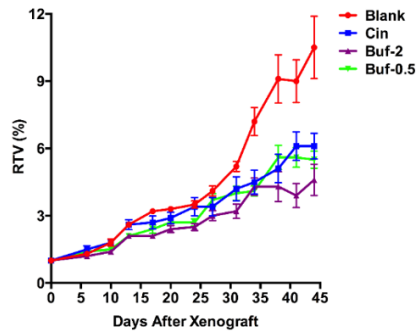

Supplement: pone.0169141.s004.pdf [file pone.0169141.s004.pdf]
